# Supplementary material
Source: PubMed Central journal article supplement (PMC9308654)
Supplement: NIHMS1787848-supplement-1.pdf [file NIHMS1787848-supplement-1.pdf]

| Supplemental Table 1. Comparison of demographic characteristics between women recommended for treatment and included vs. women recommended for treatment and excluded due to missing covariates |                                  |                                    |         |                                     |                                    |         |
|-------------------------------------------------------------------------------------------------------------------------------------------------------------------------------------------------|----------------------------------|------------------------------------|---------|-------------------------------------|------------------------------------|---------|
|                                                                                                                                                                                                 | Recommended for radiation, n (%) |                                    |         | Recommended for chemotherapy, n (%) |                                    |         |
|                                                                                                                                                                                                 | Included in analysis<br>n=75,447 | Excluded from analysis<br>n=44,686 | p       | Included in analysis<br>60187       | Excluded from analysis<br>n=38,170 | p       |
| <b>Race</b>                                                                                                                                                                                     |                                  |                                    | <0.0001 |                                     |                                    | <0.0001 |
| White                                                                                                                                                                                           | 66,431 (88.1)                    | 38,598 (86.4)                      |         | 50,094 (83.2)                       | 31,063 (81.4)                      |         |
| Black                                                                                                                                                                                           | 9,016 (11.9)                     | 6,088 (13.6)                       |         | 10,093 (16.8)                       | 7,107 (18.6)                       |         |
| <b>Age at diagnosis</b>                                                                                                                                                                         |                                  |                                    | <0.0001 |                                     |                                    | <0.0001 |
| <50                                                                                                                                                                                             | 4,195 (5.6)                      | 4,558 (10.2)                       |         | 3,765 (6.3)                         | 5,522 (14.5)                       |         |
| 50-69                                                                                                                                                                                           | 46,494 (61.6)                    | 24,818 (55.5)                      |         | 37,743 (62.7)                       | 22,156 (58.1)                      |         |
| ≥70                                                                                                                                                                                             | 24,758 (32.8)                    | 15,310 (34.3)                      |         | 18,679 (31.0)                       | 10,492 (27.5)                      |         |
| <b>Charlson Comorbidity Score</b>                                                                                                                                                               |                                  |                                    | <0.0001 |                                     |                                    | <0.0001 |
| 0                                                                                                                                                                                               | 57,121 (75.7)                    | 32,483 (72.7)                      |         | 45,474 (75.6)                       | 28,858 (75.6)                      |         |
| 1                                                                                                                                                                                               | 14,579 (19.3)                    | 8,761 (19.6)                       |         | 11,692 (19.4)                       | 7,080 (18.6)                       |         |
| ≥2                                                                                                                                                                                              | 3,747 (5.0)                      | 3,442 (7.7)                        |         | 3,021 (5.0)                         | 2,232 (5.9)                        |         |
| <b>Insurance</b>                                                                                                                                                                                |                                  |                                    | <0.0001 |                                     |                                    | <0.0001 |
| None                                                                                                                                                                                            | 2,016 (2.7)                      | 1,421 (3.2)                        |         | 1,852 (3.1)                         | 1,547 (4.1)                        |         |
| Private                                                                                                                                                                                         | 33,101 (43.9)                    | 17,877 (40.0)                      |         | 26,249 (43.6)                       | 17,170 (45.0)                      |         |
| Medicaid                                                                                                                                                                                        | 3,118 (4.1)                      | 2,741 (6.1)                        |         | 2,873 (4.8)                         | 2,828 (7.4)                        |         |
| Medicare                                                                                                                                                                                        | 35,428 (47.0)                    | 21,571 (48.3)                      |         | 27,787 (46.2)                       | 15,644 (41.0)                      |         |
| Other Government                                                                                                                                                                                | 601 (0.8)                        | 341 (0.8)                          |         | 519 (0.9)                           | 316 (0.8)                          |         |
| Insurance Status Unknown                                                                                                                                                                        | 1,183 (1.6)                      | 735 (1.6)                          |         | 907 (1.5)                           | 665 (1.7)                          |         |

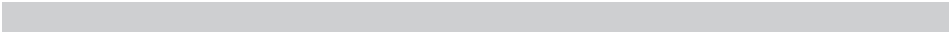

Supplemental Table 2. Odds ratios (ORs) and 95% confidence intervals (CIs) for associations between race and refusal of adjuvant treatment in models stratified by histology, National Cancer Database 2004-2015

| <b>Radiation</b>                                                                                                                                                                                                                                                                                                                                                                                                                                                                                                                                                                                                                                                                                   |                                    |                                     |                    |                           |                             |                       |
|----------------------------------------------------------------------------------------------------------------------------------------------------------------------------------------------------------------------------------------------------------------------------------------------------------------------------------------------------------------------------------------------------------------------------------------------------------------------------------------------------------------------------------------------------------------------------------------------------------------------------------------------------------------------------------------------------|------------------------------------|-------------------------------------|--------------------|---------------------------|-----------------------------|-----------------------|
|                                                                                                                                                                                                                                                                                                                                                                                                                                                                                                                                                                                                                                                                                                    | Low-grade endometrioid<br>n=36,400 | High-grade endometrioid<br>n=15,749 | Serous<br>n=8,202  | Carcinosarcoma<br>n=5,959 | Mixed epithelial<br>n=7,245 | Clear cell<br>n=1,892 |
| <b>Race</b>                                                                                                                                                                                                                                                                                                                                                                                                                                                                                                                                                                                                                                                                                        | aOR (95% CI)                       |                                     |                    |                           |                             |                       |
| NHW                                                                                                                                                                                                                                                                                                                                                                                                                                                                                                                                                                                                                                                                                                | 1.00                               | 1.00                                | 1.00               | 1.00                      | 1.00                        | 1.00                  |
| NHB                                                                                                                                                                                                                                                                                                                                                                                                                                                                                                                                                                                                                                                                                                | 0.86 (0.71, 1.04)                  | 0.93 (0.73, 1.18)                   | 1.36 (1.07, 1.72)  | 0.87 (0.67, 1.13)         | 1.11 (0.84, 1.48)           | 1.52 (0.91, 2.55)     |
| <b>Chemotherapy</b>                                                                                                                                                                                                                                                                                                                                                                                                                                                                                                                                                                                                                                                                                |                                    |                                     |                    |                           |                             |                       |
|                                                                                                                                                                                                                                                                                                                                                                                                                                                                                                                                                                                                                                                                                                    | Low-grade endometrioid<br>n=15,626 | High-grade endometrioid<br>n=10,908 | Serous<br>n=14,473 | Carcinosarcoma<br>n=8,883 | Mixed epithelial<br>n=7,902 | Clear cell<br>n=2,395 |
| <b>Race</b>                                                                                                                                                                                                                                                                                                                                                                                                                                                                                                                                                                                                                                                                                        | aOR (95% CI)                       |                                     |                    |                           |                             |                       |
| NHW                                                                                                                                                                                                                                                                                                                                                                                                                                                                                                                                                                                                                                                                                                | 1.00                               | 1.00                                | 1.00               | 1.00                      | 1.00                        | 1.00                  |
| NHB                                                                                                                                                                                                                                                                                                                                                                                                                                                                                                                                                                                                                                                                                                | 1.20 (0.98, 1.46)                  | 1.07 (0.87, 1.31)                   | 1.51 (1.27, 1.81)  | 1.19 (0.98, 1.44)         | 1.12 (0.88, 1.44)           | 1.51 (1.01, 2.25)     |
| Multivariable aOR adjusted for: race (White, Black), age ( $\leq 50$ , 50-69, $\geq 70$ ), Charlson comorbidity score (0, 1, $\geq 2$ ), insurance (None, Private, Medicaid, Medicare, Other Government), income ( $< \$48,000$ $\geq \$48,000$ ), education ( $\geq 21\%$ , 13%-20.9%, 7%-12.9%, $< 7\%$ ), hospital facility type (Community Cancer Program, Comprehensive Community Cancer Program, Academic/Research Program, Integrated Network Cancer Program, unknown), hospital facility location (Northeast, South, Midwest, Mountain, Pacific), stage (I, II, III, IV), chemotherapy (no, yes, unknown) in radiation analysis, and radiation (no, yes, unknown) in chemotherapy analysis |                                    |                                     |                    |                           |                             |                       |
